# Supplementary material for: LIF neuron —a memristive realization
Source: Frontiers journal article supplement (doi:10.3389/felec.2024.1366299), 2024-09-06
Supplement: Data_Sheet_1.docx [file Data_Sheet_1.docx]

Supplementary Material

# Supplementary Data

# Supplementary Figures and Tables

## Supplementary Figures

**Supplementary Figure 1.**


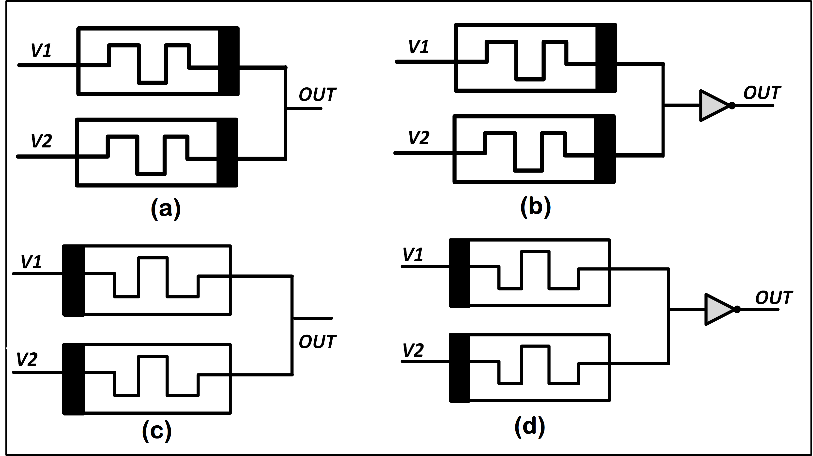


Fig. 1: The schematic of MRL-based logic gates

(a) AND, (b) NAND, (c) OR and (d) NOR

**Supplementary Figure 2.**

**
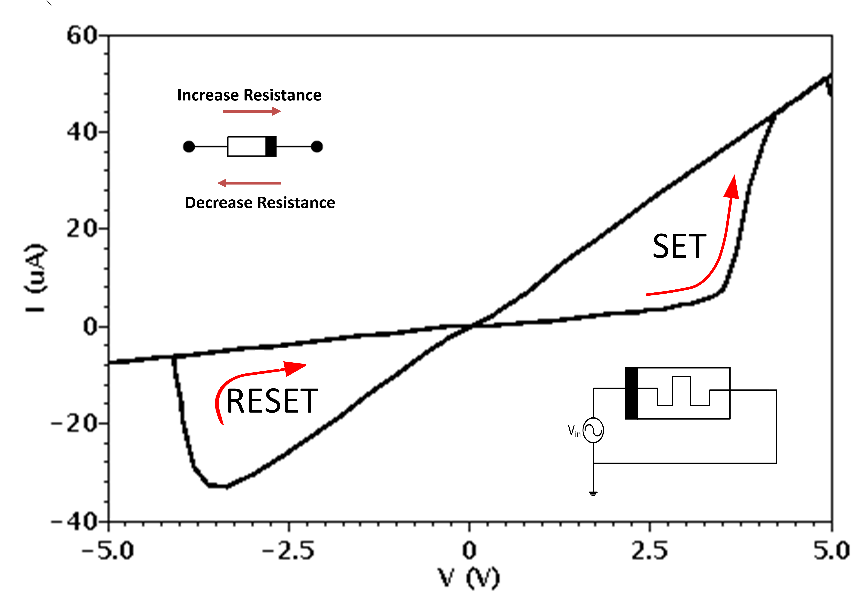
**

Fig. 2: The I-V curve of the  memristor device. Current flows through the device from the bar side, the resistance of the device decreases (SET process). Current enters from the non-bar side, the devices resistance increases (RESET process)

**Supplementary Figure 3.**


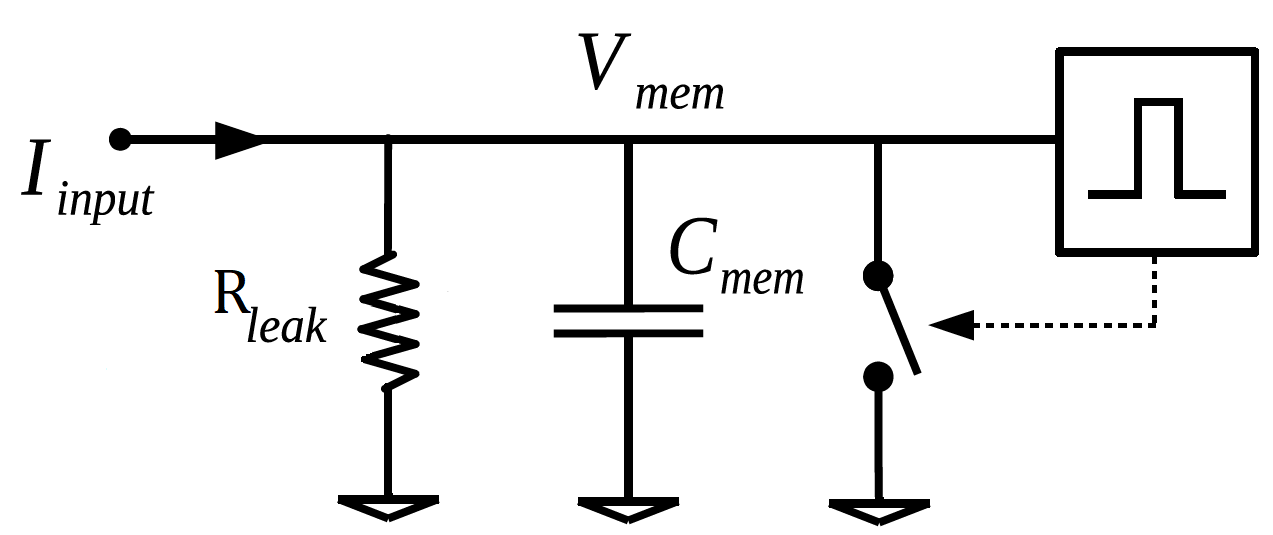


Fig. 3: The schematic diagram of the leaky integrate-and-fire model.

**Supplementary Figure 4.**

**
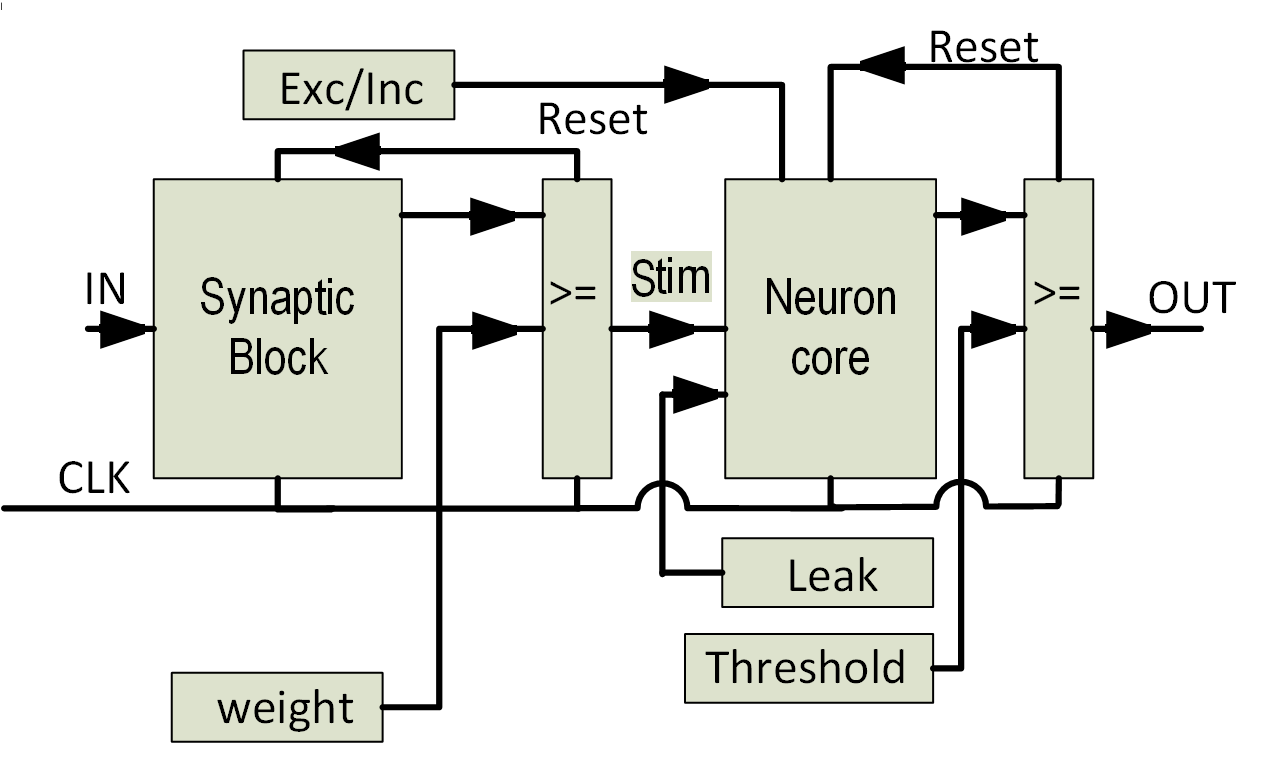
**

Fig. 4: The Schematic of the proposed MRL-based LIF neuron

**Supplementary Figure 5.**


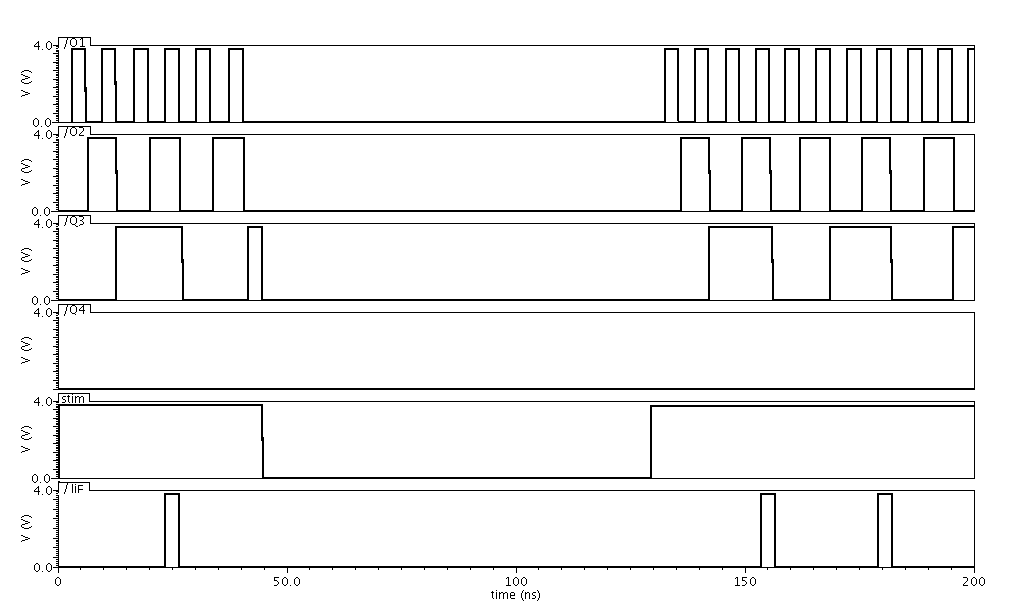


Fig. 5: The time diagrams for the proposed MRL-based LIF neuron. Output of the up-down counter Q1 Q2 Q3 Q4 begins incremented /decremented as the input “Stim” generated from the synapse block. Synaptic weights accumulated until the threshold value (Vth=7) is reached when the neuron fires.

**Supplementary Figure 6.**


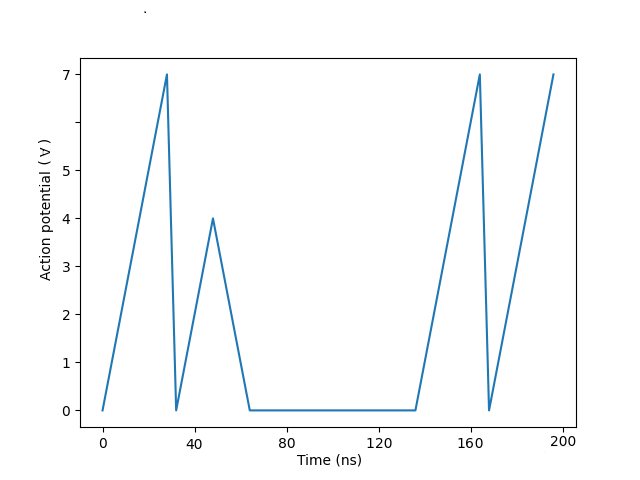


Fig.6: The action potential of the memristive LIF neuron model shows three fire events taking place as the threshold value (Vth=7) is reached and one short spike due to short current because of no input spikes to inter the up-down counter “leak behavior commences”.

**Supplementary Figure 7**

**
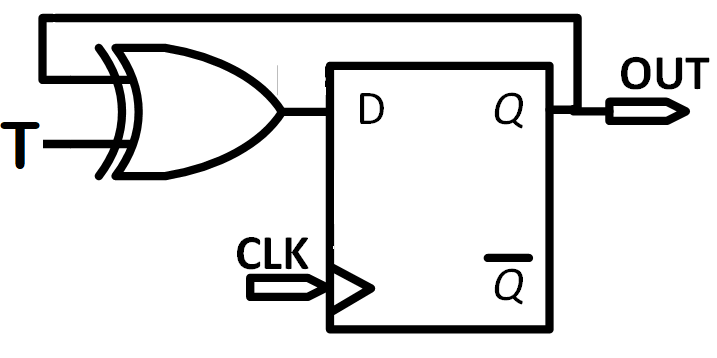
**

Fig.7: The circuit schematic for T flip-flops (TFF)

**Supplementary Figure 8.**


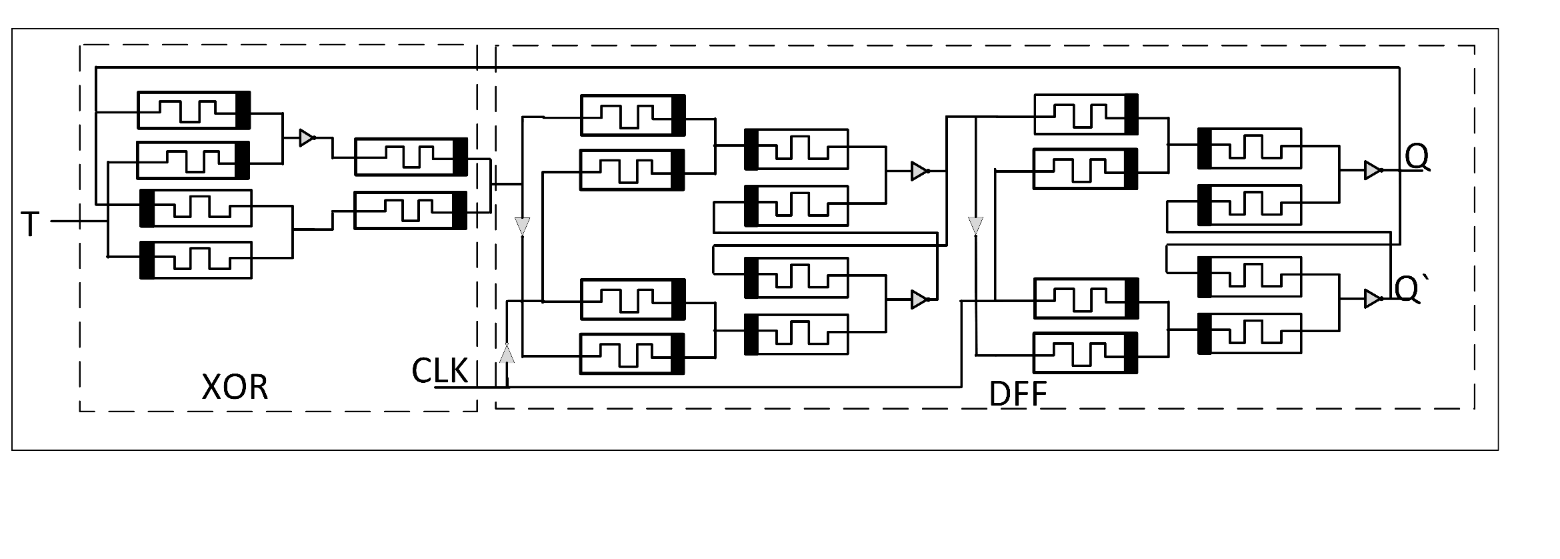


Fig.8: The circuit schematic of the memristor-based TFF

**Supplementary Figure 9.**


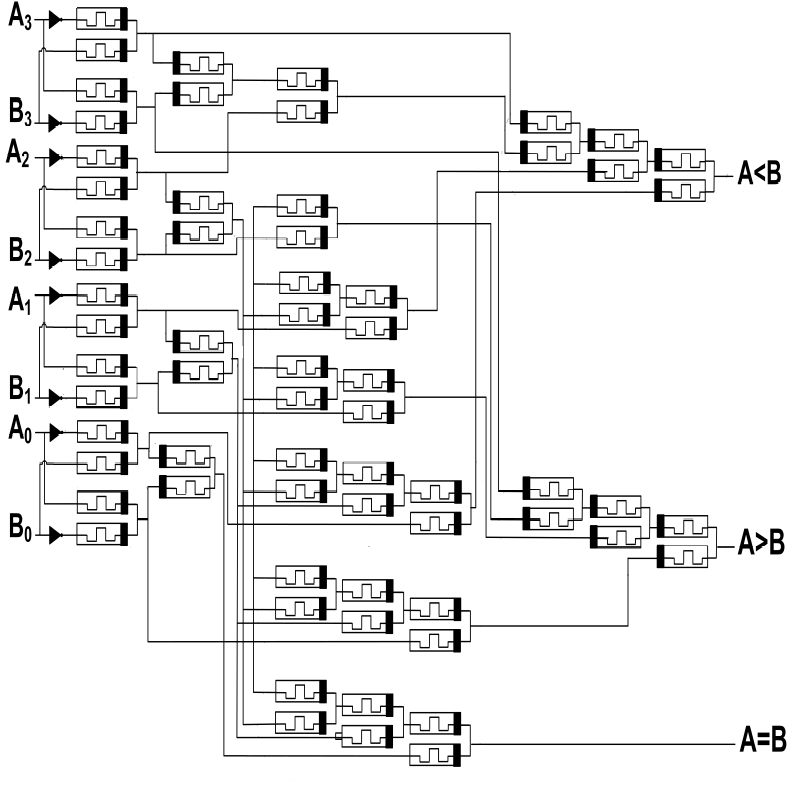


Fig.9: The circuit schematic of the memristor-based 4-bit comparator.

## Supplementary Tables

Table 1. A comparison between number of CMOS-based TFF and the proposed memristive TFF

| **TFF Design** | TGB  [22] | Modified CMOS   [22] | GDI  [22] | MRL_ based TFF |
| --- | --- | --- | --- | --- |
| **MOSFET** | 26 | 24 | 22 | 16 |
| **Memristor** | - | - | *-* | 22 |
| **Delay (Ps)** | 79.1 | 60.6 | 50.2 | 34.1 |
| **Power (µW)** | 55.3 | 42.7 | 17.5 | 12.3 |

| **Design Element** | | **Up-down counter** | **Up- counter** | **Comparator/Synaptic** | **Comparator/Core** |
| --- | --- | --- | --- | --- | --- |
| **Device** | **MOSFET** | 34 | 32 | 16 | 16 |
| **Memristor** | 110 | 94 | 66 | 66 |

Table 2. Number of all devices in the proposed design of the Memristive LIF neuron
